# Supplementary material for: Commercial Saccharomyces cerevisiae Yeast Strains Significantly Impact Shiraz Tannin and Polysaccharide Composition with Implications for Wine Colour and Astringency
Source: PubMed Central journal article supplement (PMC6770880; doi:10.3390/biom9090466), 2019-09-09
Supplement: biomolecules-09-00466-s001.pdf [file biomolecules-09-00466-s001.pdf]

**Table S1.** Attributes, definitions and reference standards evaluated by panellists in formal sessions for the wines.

| Attribute         | Definition/Synonyms                                                                                                              | Standard composition                                                     |
|-------------------|----------------------------------------------------------------------------------------------------------------------------------|--------------------------------------------------------------------------|
| <i>Appearance</i> |                                                                                                                                  |                                                                          |
| Opacity           | The degree to which light is not allowed to pass through a sample                                                                |                                                                          |
| <i>Aroma</i>      |                                                                                                                                  |                                                                          |
| Overall fruit     | Intensity of the fruit aromas in the sample                                                                                      |                                                                          |
| Red fruits        | Intensity of the aroma of red fruits and berries: raspberries, strawberries, cranberries, redcurrants                            | 3 x frozen raspberries, Sara Lee brand                                   |
| Dark fruits       | Intensity of the aroma of dark fruits and berries: blackberries, plums, black currants, cherries                                 | 3 x frozen blueberries, 1 x frozen blackberry, Sara Lee brand            |
| Confection        | Intensity of the aroma of confection: raspberry lollies, musk lollies                                                            | 3 x raspberry lollies, Natural Confectionary Company brand               |
| Floral            | Intensity of the aroma of flowers: violets, roses                                                                                | 40 $\mu$ L of 100 mg/L Linalool, 25 $\mu$ L of 200 mg/L 2-phenyl ethanol |
| Green             | Intensity of the aroma of green stalks, leaves, grass, green beans, green capsicum, geranium                                     | 1 tomato stalk and 1 cm cut up fresh green bean, no wine                 |
| Herbal            | Intensity of the aroma of herbs: mixed herbs, mint, menthol                                                                      | 1 mint leaf, crushed and 1/8 tsp dried mixed herbs, no wine              |
| Vegetal           | Intensity of the aroma of various vegetables, cooked vegetables                                                                  | 1 tbsp vegetable water, tin of cooked green beans, Edgell brand          |
| Vanilla/Chocolate | Intensity of the aroma of vanilla and chocolate.                                                                                 | 1/8 tsp vanilla paste, Queen brand                                       |
| Earthy            | Intensity of the aroma of wet earth, organic matter, compost, mushrooms, beetroot.                                               | 25 $\mu$ L of 4 mg/L geosmin                                             |
| Pungent           | Intensity of the aroma and effect of alcohol                                                                                     | 4 ml ethanol                                                             |
| <i>Palate</i>     |                                                                                                                                  |                                                                          |
| Overall fruit     | Intensity of fruit flavours in the sample                                                                                        |                                                                          |
| Red fruits        | Intensity of the flavour of red fruits and berries: raspberries, strawberries, cranberries                                       |                                                                          |
| Dark Fruits       | Intensity of the flavour of various dark fruits: blackberries, currants, plums, cherries                                         |                                                                          |
| Green             | Intensity of the flavour of green stalks, green capsicum, green bean, herbs.                                                     |                                                                          |
| Vanilla           | Intensity of the flavour of vanilla, chocolate                                                                                   |                                                                          |
| Viscosity         | Perception of the body, weight or thickness of the wine in the mouth. Low, watery; high, oily, thick.                            |                                                                          |
| Sweet             | Intensity of the taste of sucrose                                                                                                |                                                                          |
| Salt              | Intensity of the taste of salt                                                                                                   |                                                                          |
| Acid              | Intensity of acid taste in the mouth, including aftertaste                                                                       |                                                                          |
| Hotness           | The intensity of alcohol hotness (burning) perceived in-mouth or after expectoration.<br>Low, warm; high, hot, burning.          |                                                                          |
| Astringency       | Drying and mouth-puckering sensation.<br>Low, coating teeth; medium, mouth coating/drying; high, puckering, lasting astringency. |                                                                          |
| Bitter            | The intensity of bitter taste perceived in the mouth, or after expectoration.                                                    |                                                                          |
| Fruit AT          | The lingering fruit flavour perceived in the mouth after expectorating.                                                          |                                                                          |

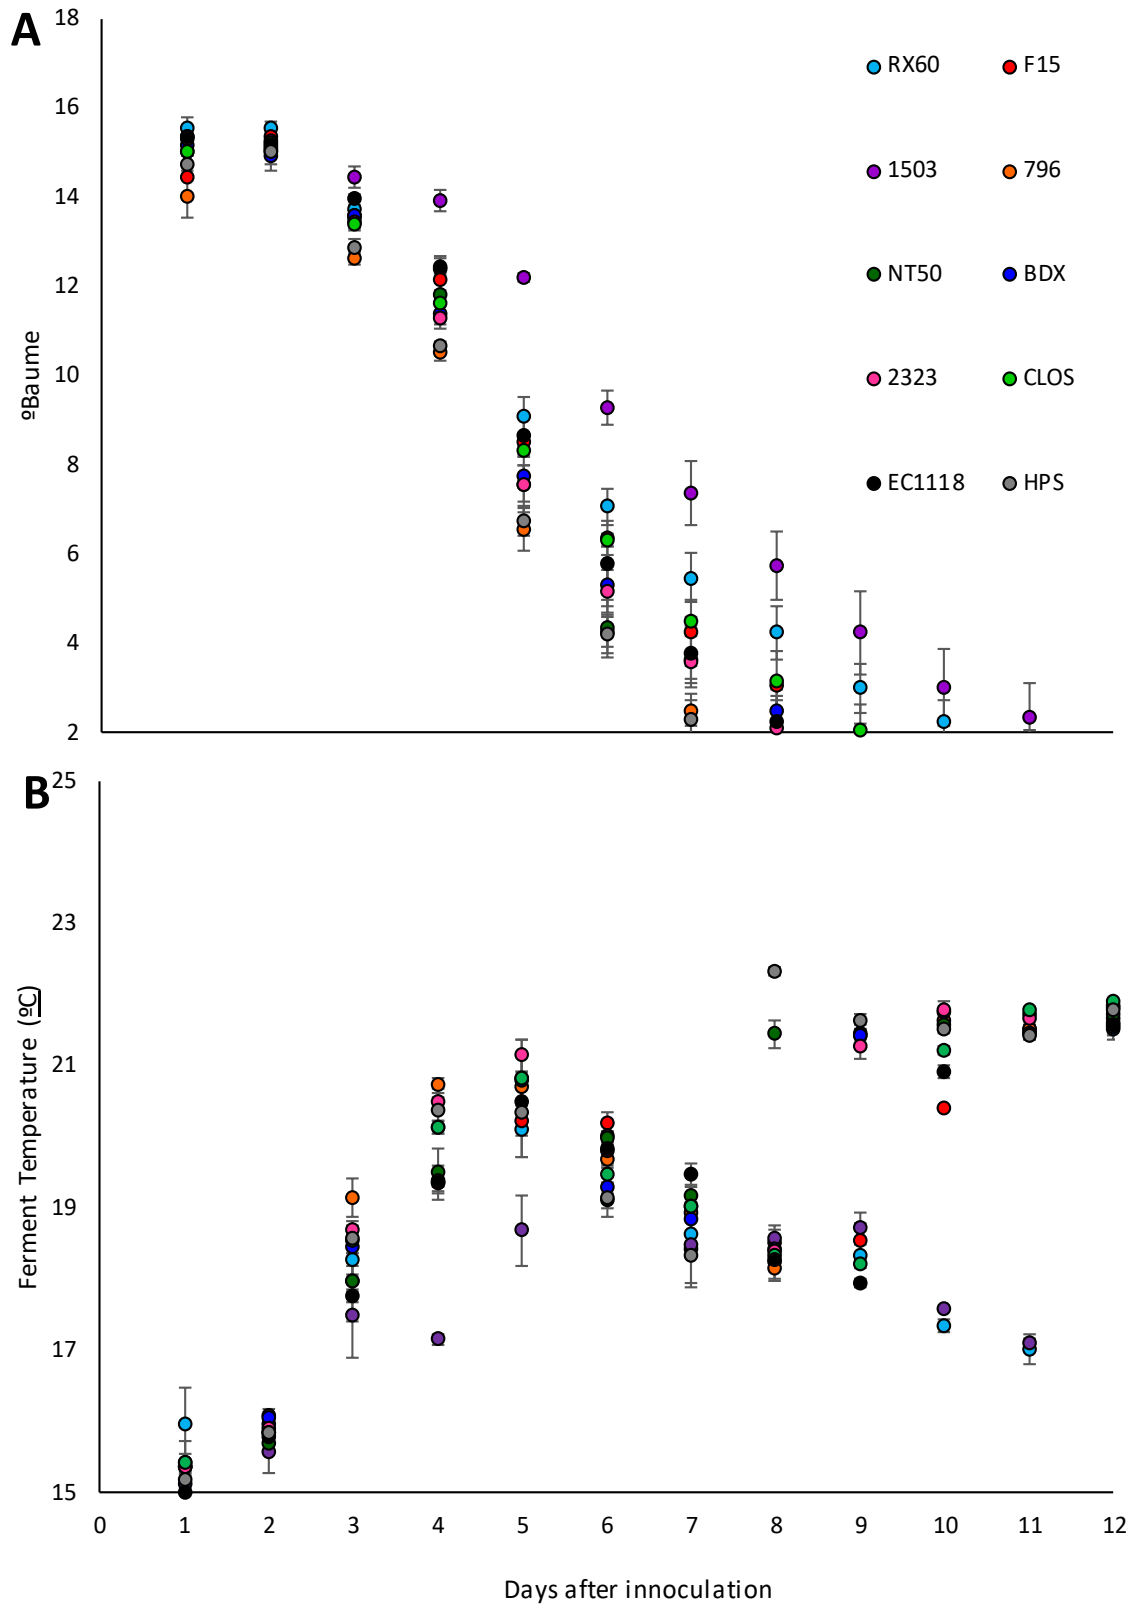

**Figure S1.** Changes in (A) must sugar and (B) ferment temperature during the initial phase of fermentation of 10 commercial yeast strains (pressing occurred at 2 °Baume).

**Table S2.** Fermentation products in Shiraz wines prepared using 10 commercial yeast strains analysed at 2 years of wine age (data show means compared by one-way ANOVA, where significant differences of  $p < 0.01$  were compared by a post-hoc Student's  $t$ -test, significant differences within a row are shown by different letters).

|                          | unit | Yeast strain |         |        |        |         |        |        |        |        |        | ANOVA<br><i>P</i> value |
|--------------------------|------|--------------|---------|--------|--------|---------|--------|--------|--------|--------|--------|-------------------------|
|                          |      | 2323         | 1503    | 1796   | BDX    | CLOS    | EC1118 | F15    | NT50   | RX60   | HPS    |                         |
| <i>Acetate esters</i>    |      |              |         |        |        |         |        |        |        |        |        |                         |
| ethyl acetate            | mg/L | 51cd         | 41f     | 60ab   | 43ef   | 48de    | 47de   | 55bc   | 40f    | 63a    | 63a    | <0.0001                 |
| hexyl acetate            | μg/L | 17.2cde      | 11.6e   | 37.2a  | 12.6e  | 14.6de  | 13.0de | 22.9bc | 15.5de | 18.4cd | 25.5b  | <0.0001                 |
| 2-methylpropyl acetate   | μg/L | 609c         | 1255a   | 677c   | 707c   | 719c    | 968b   | 730c   | 1002b  | 819bc  | 592c   | <0.001                  |
| 2-phenyl ethyl acetate   | μg/L | 61b          | 85a     | 78a    | 90a    | 46cd    | 63b    | 53bc   | 59bc   | 38d    | 58bc   | <0.0001                 |
| 3-methylbutyl acetate    | μg/L | 941b         | 382d    | 1292a  | 913b   | 665c    | 525cd  | 912b   | 523cd  | 603c   | 1057b  | <0.0001                 |
| 2-methylbutyl acetate    | μg/L | 269a         | 134c    | 262a   | 280a   | 184b    | 182b   | 220b   | 139c   | 184b   | 298a   | <0.0001                 |
| <i>Ethyl esters</i>      |      |              |         |        |        |         |        |        |        |        |        |                         |
| ethyl butanoate          | μg/L | 436ab        | 365bc   | 456a   | 328c   | 307c    | 292c   | 348bc  | 337c   | 455a   | 420ab  | <0.01                   |
| ethyl propanoate         | μg/L | 242d         | 361a    | 330b   | 258cd  | 257cd   | 317b   | 236d   | 324b   | 274c   | 241d   | <0.0001                 |
| ethyl hexanoate          | μg/L | 58bc         | 58b     | 70a    | 42d    | 55bc    | 48cd   | 58b    | 58bc   | 76a    | 53bc   | <0.0001                 |
| ethyl octanoate          | μg/L | 53bc         | 55b     | 69a    | 37d    | 50bc    | 44cd   | 58b    | 56b    | 71a    | 53b    | <0.0001                 |
| ethyl decanoate          | μg/L | 7.4de        | 10.0bc  | 10.5bc | 6.4e   | 7.1e    | 6.8e   | 11.0ab | 9.2cd  | 12.2a  | 9.4c   | <0.0001                 |
| ethyl 2-methylbutanoate  | μg/L | 47ab         | 49a     | 32c    | 40b    | 30c     | 44ab   | 31c    | 47ab   | 26c    | 40ab   | <0.0001                 |
| ethyl-3-methylbutanoate  | μg/L | 82a          | 71ab    | 47de   | 80a    | 43e     | 70ab   | 55cd   | 67bc   | 39e    | 69ab   | <0.0001                 |
| ethyl 2-methylpropanoate | μg/L | 211a         | 108d    | 110d   | 214a   | 115d    | 104d   | 124d   | 152bc  | 130cd  | 174b   | <0.0001                 |
| <i>Higher alcohols</i>   |      |              |         |        |        |         |        |        |        |        |        |                         |
| butanol                  | mg/L | 1.0bcd       | 1.2abc  | 1.1abc | 0.7d   | 0.9cd   | 1.4a   | 0.8d   | 1.2ab  | 1.0bcd | 1.3ab  | <0.0001                 |
| 2-methylbutanol          | mg/L | 109b         | 97c     | 78f    | 158a   | 86de    | 94cd   | 94cd   | 80ef   | 73f    | 92cd   | <0.0001                 |
| 3-methylbutanol          | mg/L | 267b         | 234cd   | 213ef  | 385a   | 220de   | 204f   | 238c   | 188gh  | 183h   | 202fg  | <0.0001                 |
| hexanol                  | mg/L | 4.8bcd       | 6.0a    | 5.2b   | 4.9bcd | 4.7cd   | 5.0bcd | 5.1bc  | 4.1e   | 6.4a   | 4.5de  | <0.0001                 |
| 2-phenyl ethyl ethanol   | mg/L | 48.1cde      | 90.3a   | 43.3ef | 88.3a  | 48.9cd  | 68.7b  | 45.0de | 52.0c  | 39.3fg | 35.7g  | <0.0001                 |
| 2-methylpropanol         | mg/L | 69b          | 48d     | 41e    | 123a   | 52cd    | 40e    | 56c    | 42e    | 55c    | 56c    | <0.0001                 |
| <i>Volatile acids</i>    |      |              |         |        |        |         |        |        |        |        |        |                         |
| acetic acid              | mg/L | 244bc        | 198cd   | 295a   | 208bcd | 237bc   | 244b   | 293a   | 193d   | 330a   | 310a   | <0.0001                 |
| butanoic acid            | mg/L | 12.2         | 12.0    | 12.1   | 11.6   | 11.9    | 11.7   | 11.8   | 11.9   | 11.6   | 11.8   | ns                      |
| propanoic acid           | mg/L | 1.7de        | 2.1abcd | 2.2ab  | 1.9cde | 1.9bcde | 2.3a   | 1.8de  | 2.2abc | 1.7e   | 1.8cde | <0.01                   |
| hexanoic acid            | mg/L | 1.9bcd       | 2.1b    | 2.7a   | 1.4e   | 1.9bcde | 1.6de  | 2.2b   | 2.1bc  | 2.7a   | 1.7cde | <0.0001                 |
| octanoic acid            | mg/L | 1.9cd        | 1.9c    | 2.5a   | 1.4e   | 1.8cd   | 1.6de  | 2.0bc  | 2.0bc  | 2.2b   | 1.9c   | <0.0001                 |
| decanoic acid            | μg/L | 417bcd       | 419bc   | 639a   | 297cde | 276de   | 233e   | 393bcd | 439b   | 573a   | 392bcd | <0.0001                 |
| 2-methyl butanoic acid   | μg/L | 890a         | 831ab   | 632e   | 770bc  | 654de   | 788b   | 761bc  | 781bc  | 641e   | 713cd  | <0.0001                 |
| 3-methyl butanoic acid   | μg/L | 1389a        | 1080b   | 906cd  | 1302a  | 777de   | 1103b  | 1100b  | 997bc  | 764e   | 1031bc | <0.0001                 |
| 2-methyl propanoic acid  | μg/L | 1012a        | 416d    | 717bc  | 1015a  | 676bc   | 541cd  | 807ab  | 634bcd | 722bc  | 967a   | <0.001                  |

ns, not significant

**Table S3.** Low molecular weight volatile sulfur compounds in Shiraz wines prepared using 10 commercial yeast strains analysed at 2 years of wine age (data show means compared by one-way ANOVA, where significant differences of  $p < 0.05$  were compared by a post-hoc Student's  $t$ -test, significant differences within a row are shown by different letters).

|                                      | Yeast strain |         |         |         |        |         |         |         |        |        | ANOVA<br><i>P</i> value |
|--------------------------------------|--------------|---------|---------|---------|--------|---------|---------|---------|--------|--------|-------------------------|
|                                      | 2323         | 1503    | 796     | BDX     | CLOS   | EC1118  | F15     | NT50    | RX60   | HPS    |                         |
| Hydrogen sulfide ( $\mu\text{g/L}$ ) | 2.53de       | 3.35bcd | 3.02cde | 3.73abc | 4.15ab | 4.27a   | 3.37bcd | 3.80abc | 2.28e  | 3.23cd | <0.01                   |
| Methanethiol ( $\mu\text{g/L}$ )     | 2.63d        | 3.69a   | 3.09bcd | 3.83a   | 3.19bc | 3.14bcd | 3.45ab  | 3.52ab  | 2.84cd | 2.66d  | <0.001                  |
| Dimethyl sulfide ( $\mu\text{g/L}$ ) | 53.1b        | 48.8b   | 48.6b   | 136.7a  | 49.5b  | 45.9b   | 42.5b   | 47.2b   | 46.7b  | 50.5b  | <0.0001                 |
| Carbon disulfide ( $\mu\text{L}$ )   | 4.11ab       | 9.63ab  | 1.83b   | 2.58b   | 5.80ab | 7.11ab  | 9.76a   | 2.85b   | 9.26a  | 2.01b  | <0.05                   |
| Diethyl sulfide ( $\mu\text{L}$ )    | 0.22bc       | 0.30ab  | 0.25abc | 0.23bc  | 0.21c  | 0.31ab  | 0.25abc | 0.21c   | 0.32a  | 0.32a  | <0.05                   |
| Methylthioacetate ( $\mu\text{L}$ )  | 18.7a        | 12.0bc  | 9.6cd   | 18.9a   | 14.4b  | 7.4d    | 11.9bc  | 9.6cd   | 8.2d   | 12.3bc | <0.0001                 |

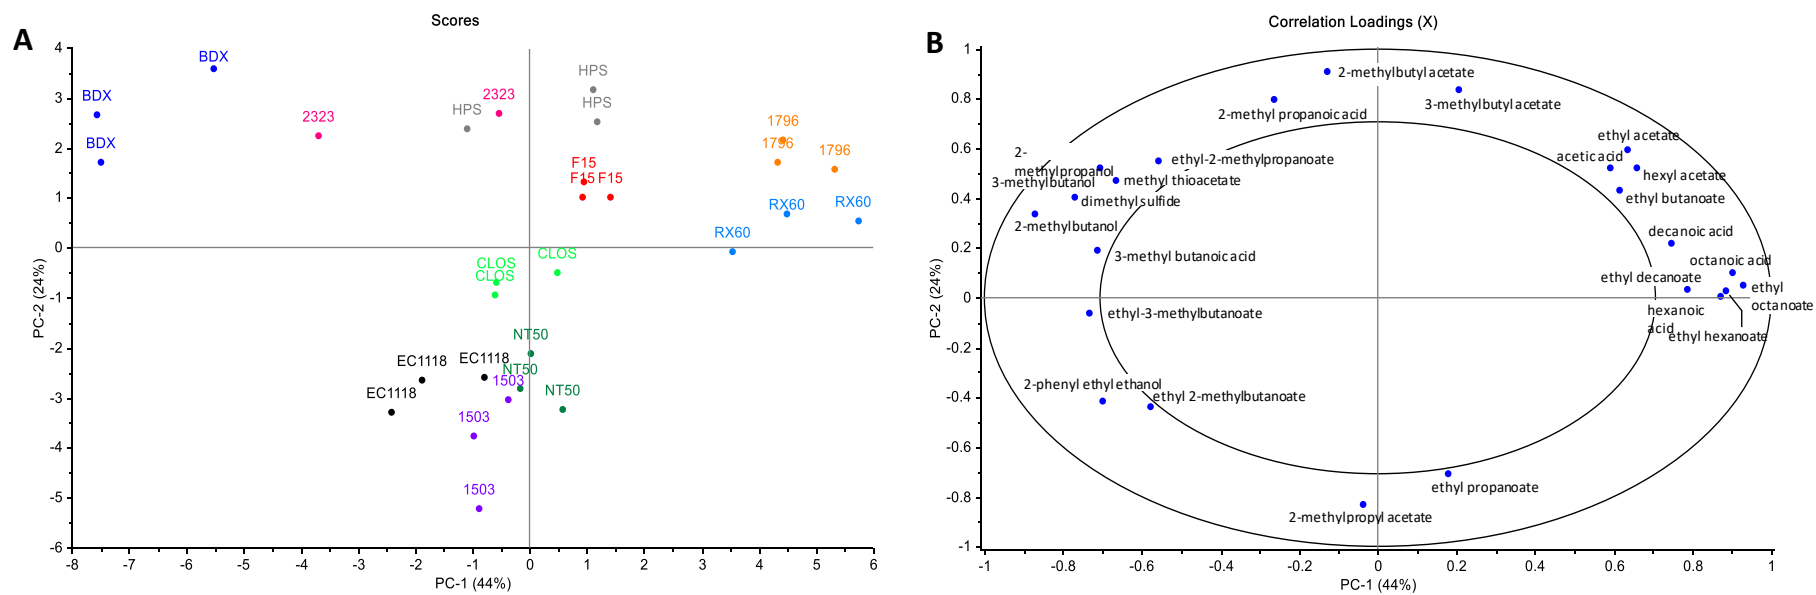

**Figure S2.** Principal component analysis of the composition of wine fermentation products and low molecular weight volatile sulfur compounds at 2 years of wine age (**A**) Scores plot showing each yeast strain as a different colour; (**B**) Correlation loadings plot for volatile compounds (triplicate wines shown for all strains except 2323 for which duplicates are shown).

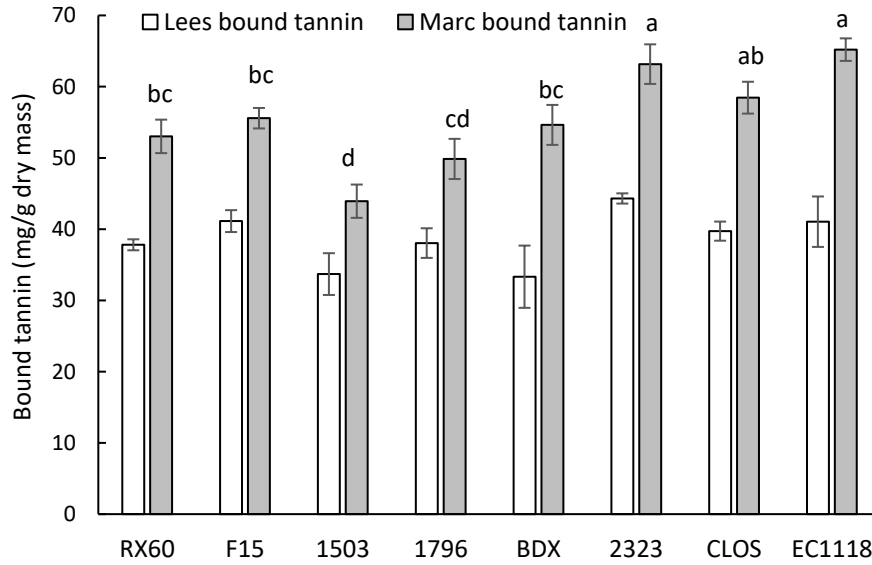

**Figure S3.** Bound tannin concentration recovered in the lees and marcs of a sub-set of 8 yeast strains determined by direct phloroglucinolysis (data show means compared by one-way ANOVA, where significant differences of  $p < 0.01$  were compared by a post-hoc Student's  $t$ -test, significant differences within a row are shown by different letters).

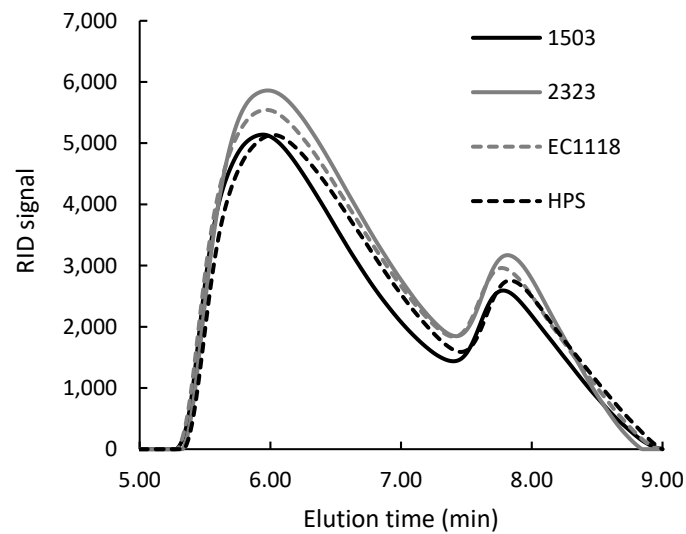

**Figure S4.** Size exclusion profiles of polysaccharides isolated from Shiraz wines prepared from four yeast strains.

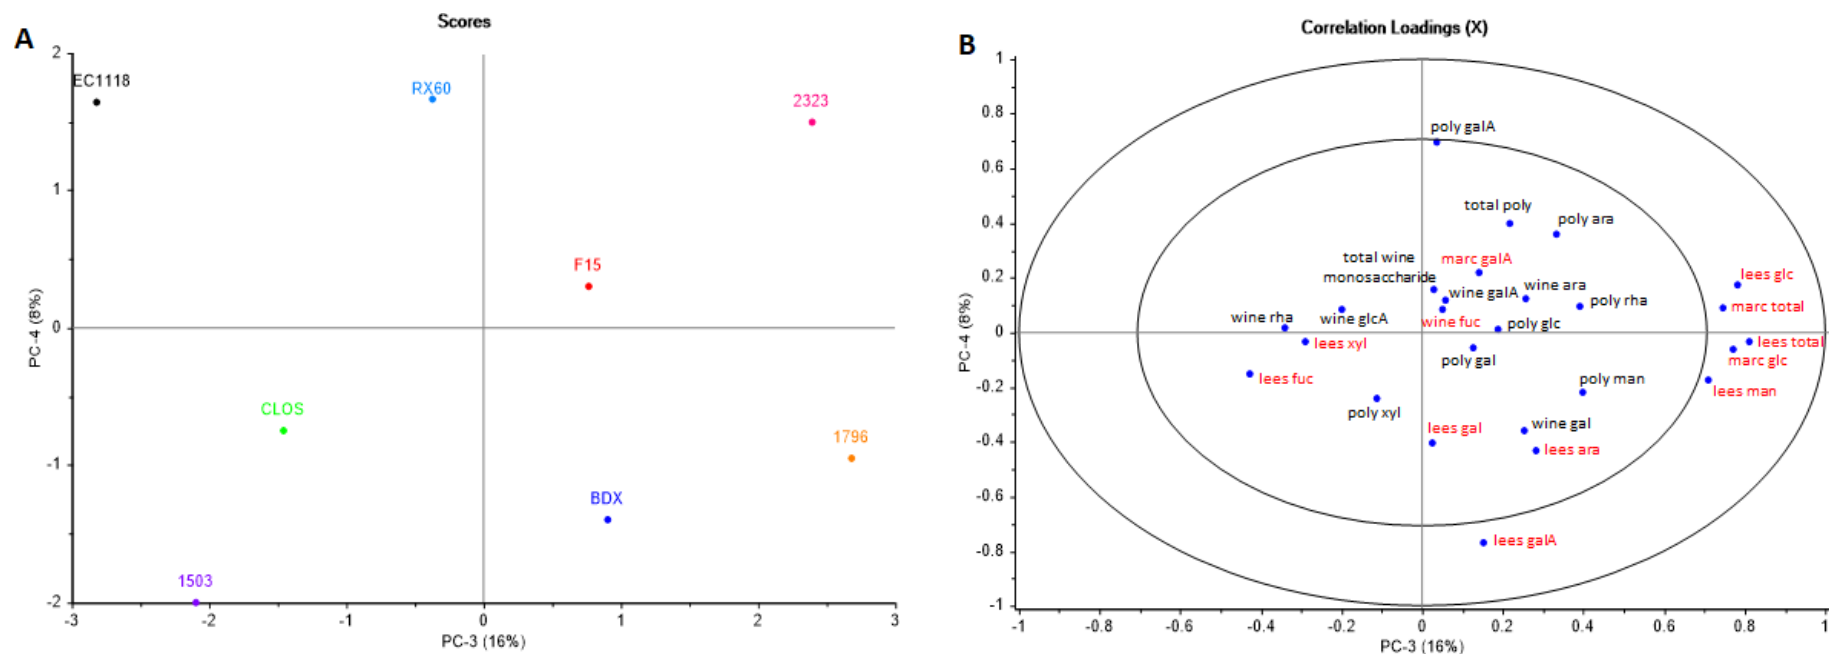

**Figure S5.** Principal component analysis showing PCs 3 and 4 of the composition of wine soluble (wine) polysaccharide-associated (poly) monosaccharides, and hydrolytically-released monosaccharides from purified lees and marcs of 8 commercial yeast strains (**A**) Scores plot showing each yeast strain as a different colour; (**B**) Correlation loadings plot for wine composition (black) and lees or marc composition (red). Abbreviations: man = mannose, rha = rhamnose, glcA = glucuronic acid, galA = galacturonic acid, glc = glucose, gal = galactose, xyl = xylose, ara = arabinose, fuc = fucose.

**Table S4.** Concentration of tannin, colour and wine-soluble and lees-associated polysaccharide recovered from model fermentations conducted by 5 yeast strains in Shiraz juice with anthocyanin and tannin added to 550 mg/L and 1.2 g/L respectively (data show means compared by one-way ANOVA, where significant differences of  $p < 0.05$  were compared by a post-hoc Student's *t*-test, significant differences within a row are shown by different letters).

|                                   | Yeast strain |       |        |        |        | ANOVA<br><i>P</i> value |
|-----------------------------------|--------------|-------|--------|--------|--------|-------------------------|
|                                   | 2323         | 1503  | BDX    | EC1118 | HPS    |                         |
| Tannin (mg/L)                     | 960          | 911   | 879    | 837    | 915    | ns                      |
| Total anthocyanin (mg/L)          | 378          | 370   | 367    | 382    | 330    | ns                      |
| Wine colour density (A.U.)        | 6.7          | 7.2   | 7.1    | 7.7    | 7.0    | ns                      |
| Non-bleachable pigment (A.U.)     | 1.36         | 1.43  | 1.37   | 1.39   | 1.53   | ns                      |
| Total wine polysaccharide (mg/L)  | 434          | 431   | 450    | 467    | 505    | ns                      |
| Mannose (mg/L)                    | 73c          | 75bc  | 73c    | 97a    | 92ab   | <0.05                   |
| Rhamnose (mg/L)                   | 25.9ab       | 20.4c | 24.8b  | 27.2a  | 25.7ab | <0.01                   |
| Glucuronic acid (mg/L)            | 9.3a         | 6.4c  | 8.2ab  | 7.4bc  | 7.0bc  | <0.05                   |
| Galacturonic acid (mg/L)          | 30.6a        | 25.7c | 26.9bc | 27.5b  | 26.6bc | <0.001                  |
| Glucose (mg/L)                    | 105          | 124   | 131    | 117    | 177    | ns                      |
| Galactose (mg/L)                  | 84           | 79    | 82     | 82     | 77     | ns                      |
| Xylose (mg/L)                     | 8.0ab        | 7.7bc | 8.4a   | 7.9ab  | 7.4c   | <0.05                   |
| Arabinose (mg/L)                  | 95           | 89    | 92     | 96     | 88     | ns                      |
| Fucose (mg/L)                     | 3.5bc        | 2.5d  | 3.3c   | 4.2a   | 4.0ab  | <0.0001                 |
| Total lees (g D. wt/90 mL)        | 0.36a        | 0.26c | 0.28b  | 0.28c  | 0.32b  | <0.0001                 |
| Total lees polysaccharide (mg/L)* | 424a         | 315c  | 347bc  | 309c   | 390b   | <0.01                   |
| Mannose (mg/L)                    | 131          | 146   | 129    | 146    | 149    | ns                      |
| Rhamnose (mg/L)                   | 1.4          | 0.9   | 0.5    | 0.7    | 1.2    | ns                      |
| Glucuronic acid (mg/L)            | 1.8          | 1.2   | 1.1    | 1.5    | 1.3    | ns                      |
| Galacturonic acid (mg/L)          | 2.5          | 2.4   | 1.7    | 1.7    | 1.7    | ns                      |
| Glucose (mg/L)                    | 281a         | 158c  | 211bc  | 153c   | 230b   | <0.001                  |
| Galactose (mg/L)                  | 2.6          | 2.8   | 1.6    | 2.5    | 3.2    | ns                      |
| Arabinose (mg/L)                  | 2.3          | 2.6   | 1.8    | 2.5    | 2.9    | ns                      |
| Fucose (mg/L)                     | 1.2          | 1.0   | 0.5    | 0.7    | 0.9    | ns                      |

ns, not significant; \*xylose not detected



**Table S5.** Mean values and LSD values from sensory analysis of the Shiraz wines made with different yeast strains.

| Sensory attribute       | Yeast strain |      |      |      |      |        |      |      |      |      | ANOVA<br><i>P</i> value | LSD  |
|-------------------------|--------------|------|------|------|------|--------|------|------|------|------|-------------------------|------|
|                         | 2323         | 1503 | 1796 | BDX  | CLOS | EC1118 | F15  | NT50 | RX60 | HPS  |                         |      |
| <i>Appearance</i>       |              |      |      |      |      |        |      |      |      |      |                         |      |
| Opacity                 | 5.62         | 3.52 | 4.99 | 4.18 | 5.15 | 4.75   | 4.86 | 4.15 | 4.72 | 4.05 | <0.0001                 | 0.29 |
| <i>Aroma</i>            |              |      |      |      |      |        |      |      |      |      |                         |      |
| Overall fruit aroma     | 3.66         | 3.34 | 3.80 | 3.44 | 3.59 | 3.73   | 3.54 | 3.51 | 3.63 | 3.66 | ns                      | ns   |
| Red fruit aroma         | 3.02         | 2.93 | 3.13 | 2.96 | 2.83 | 3.12   | 3.10 | 2.91 | 3.11 | 3.08 | ns                      | ns   |
| Dark fruit aroma        | 2.96         | 2.54 | 3.12 | 2.82 | 2.94 | 3.04   | 2.65 | 2.68 | 2.78 | 2.53 | <0.001                  | 0.33 |
| Confection aroma        | 1.38         | 1.19 | 1.70 | 1.26 | 1.30 | 1.57   | 1.62 | 1.43 | 1.50 | 1.57 | ns                      | ns   |
| Floral aroma            | 1.58         | 1.29 | 1.64 | 1.40 | 1.46 | 1.56   | 1.64 | 1.43 | 1.46 | 1.08 | ns*                     | ns   |
| Green aroma             | 1.53         | 1.46 | 1.51 | 1.51 | 1.64 | 1.48   | 1.50 | 1.40 | 1.48 | 1.42 | ns                      | ns   |
| Herbal aroma            | 1.89         | 1.63 | 1.54 | 1.96 | 1.79 | 1.75   | 1.73 | 1.42 | 1.80 | 1.56 | <0.01                   | 0.30 |
| Vegetal aroma           | 1.40         | 1.92 | 1.46 | 2.43 | 1.61 | 1.87   | 1.57 | 2.03 | 1.49 | 1.85 | <0.02                   | 0.53 |
| Vanilla/Chocolate aroma | 1.80         | 1.50 | 1.80 | 1.33 | 1.55 | 1.69   | 1.43 | 1.48 | 1.62 | 1.52 | ns*                     | ns   |
| Earthy aroma            | 2.56         | 2.52 | 2.25 | 2.42 | 2.41 | 2.29   | 2.32 | 2.40 | 2.32 | 2.29 | ns                      | ns   |
| Pungent aroma           | 2.62         | 2.57 | 2.74 | 2.84 | 2.74 | 2.65   | 2.45 | 2.46 | 2.53 | 2.61 | ns                      | ns   |
| <i>Palate</i>           |              |      |      |      |      |        |      |      |      |      |                         |      |
| Overall fruit flavour   | 3.95         | 3.86 | 4.12 | 3.80 | 3.92 | 4.01   | 4.02 | 3.90 | 4.02 | 3.92 | ns                      | ns   |
| Red fruit flavour       | 3.05         | 3.26 | 3.40 | 3.09 | 3.09 | 3.21   | 3.26 | 3.23 | 3.18 | 3.21 | ns                      | ns   |
| Dark fruit flavour      | 3.36         | 3.08 | 3.33 | 3.09 | 3.38 | 3.37   | 3.29 | 3.28 | 3.42 | 3.12 | ns                      | ns   |
| Green flavour           | 1.78         | 1.75 | 2.00 | 2.10 | 2.01 | 1.85   | 1.98 | 1.79 | 2.07 | 1.88 | ns                      | ns   |
| Vanilla flavour         | 1.74         | 1.77 | 1.81 | 1.63 | 1.71 | 1.72   | 1.75 | 1.70 | 1.82 | 1.75 | ns                      | ns   |
| Viscosity               | 2.94         | 2.73 | 2.77 | 2.80 | 2.79 | 2.71   | 2.89 | 2.72 | 2.85 | 2.72 | <0.05                   | 0.15 |
| Sweet                   | 0.83         | 1.30 | 0.98 | 0.80 | 0.74 | 1.01   | 0.91 | 1.02 | 0.81 | 0.93 | <0.05                   | 0.30 |
| Salt                    | 1.66         | 1.37 | 1.60 | 1.83 | 1.61 | 1.14   | 1.46 | 1.45 | 1.67 | 1.52 | <0.05                   | 0.36 |
| Acid                    | 3.31         | 3.12 | 3.21 | 3.36 | 3.34 | 3.14   | 3.36 | 3.31 | 3.25 | 3.36 | ns                      | ns   |
| Astringency             | 4.38         | 3.67 | 4.08 | 4.07 | 4.09 | 4.16   | 4.09 | 3.69 | 4.13 | 3.97 | <0.01                   | 0.34 |
| Hotness                 | 3.32         | 3.15 | 2.88 | 3.28 | 2.99 | 3.03   | 3.51 | 3.04 | 3.29 | 3.13 | <0.01                   | 0.32 |
| Bitter                  | 1.87         | 1.53 | 1.75 | 1.94 | 1.58 | 1.98   | 1.94 | 1.68 | 1.70 | 1.74 | <0.01                   | 0.26 |
| Fruit aftertaste        | 3.32         | 3.51 | 3.39 | 3.19 | 3.38 | 3.52   | 3.34 | 3.31 | 3.34 | 3.28 | ns                      | ns   |

ns, not significant to the 5% confidence interval; ns\*, significant to the 10% confidence interval, P<0.1; LSD, Fisher's Least Significant Difference
